# Supplementary material
Source: publisher figshare collection journal article supplement (https://geolsoc.figshare.com/articles/dataset/_/3453902)
Supplement: Supplementary file 2 [file 1]

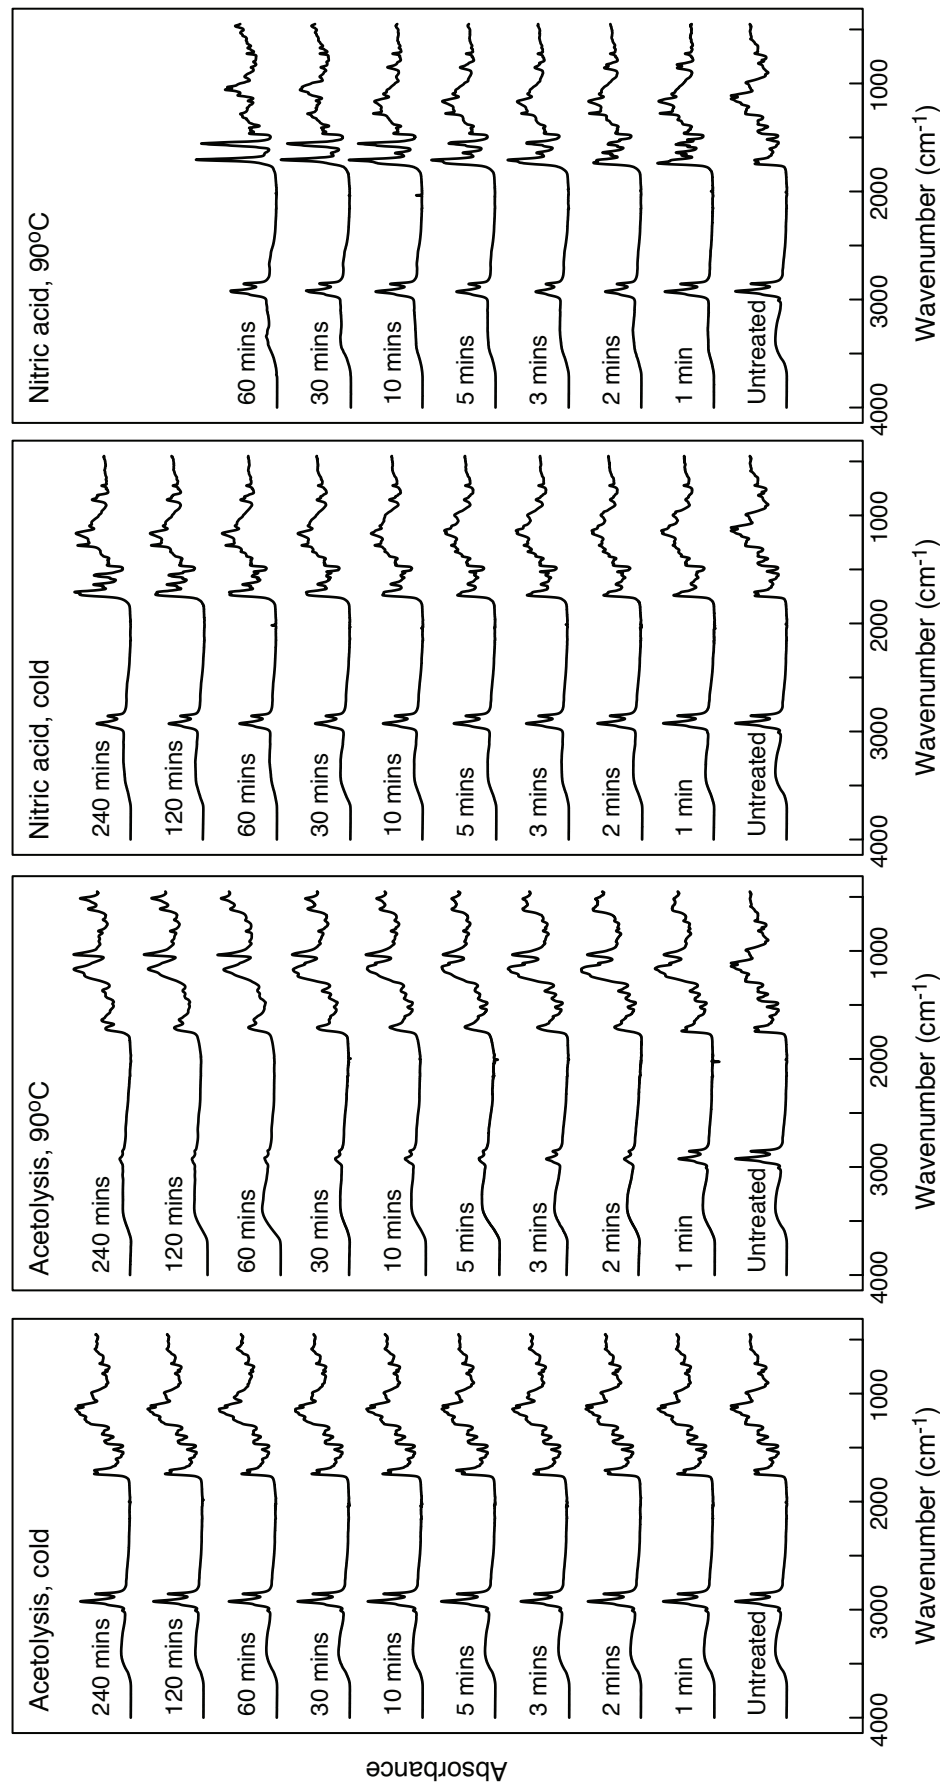

**Fig S1.** FTIR spectra for each oxidation type and duration in this study. Spectra represent the mean of six replicates, except in the case of nitric acid at 90°C for 60 minutes, for which only five of the replicates had sufficient material remaining. For each oxidation type the untreated mean spectrum is provided for comparison.

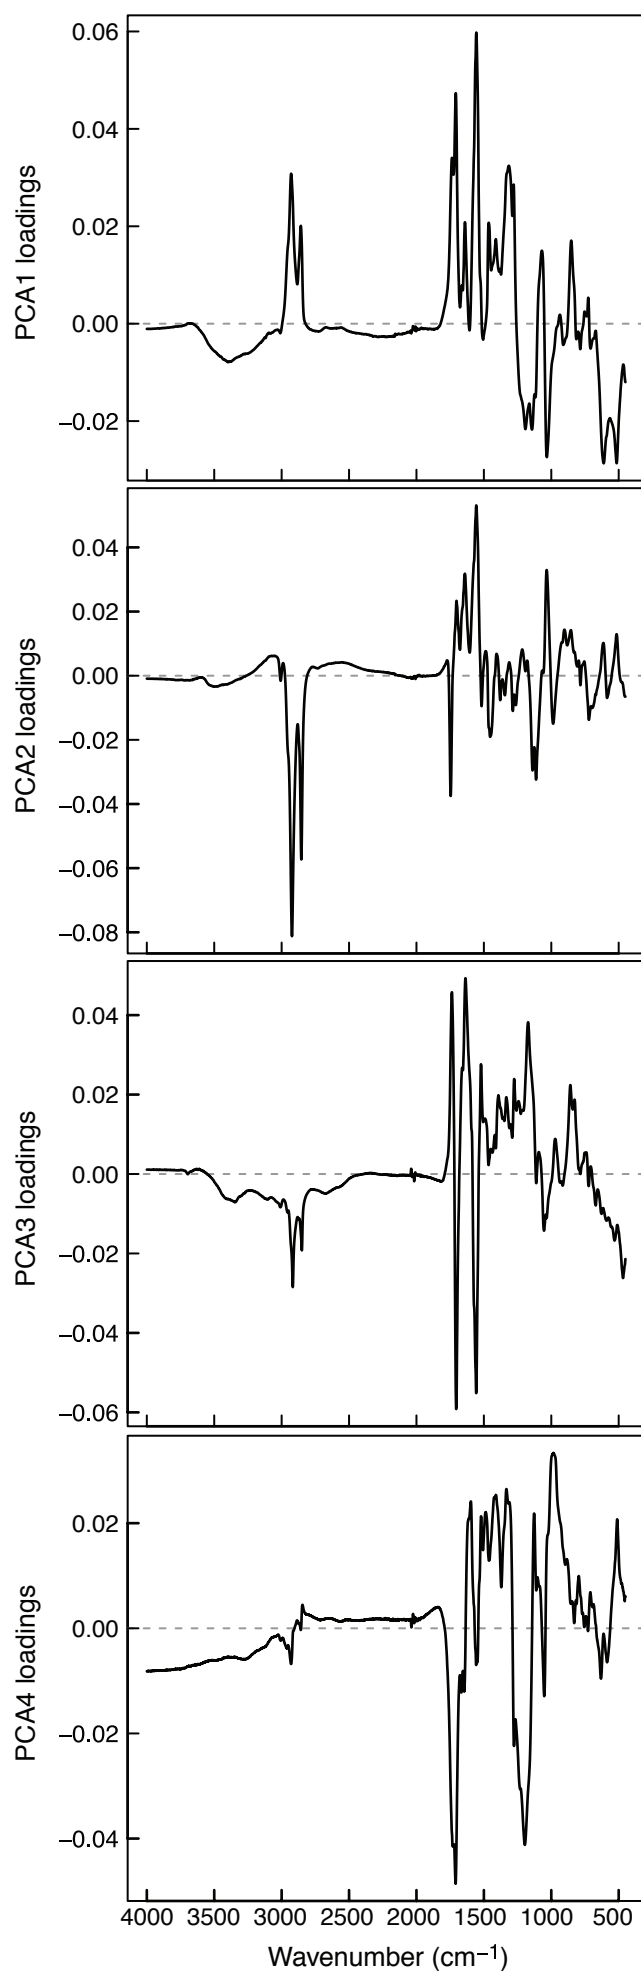

**Fig S2.** Loadings plots for first four PCA axes, for PCA of oxidised *Lycopodium*. Principal component loadings relate the original variables (IR wavenumbers) to the PCA axes.
